# Supplementary material
Source: publisher figshare collection journal article supplement (https://gsajournals.figshare.com/ndownloader/files/22601735)
Supplement: Supplementary file 1 [file 22601735]

## Sheet: Table S1
Table S1 Source Data for Figures 1-2 and S1-S3
Genotype	Normalized Leaf Number (Fig 1, Fig S3A)
AT5G67340 decoy	0.4	-1.6	0.4	0.4	-1.6	-0.6	-0.6	-0.6	1.4	-0.6	-1.6	-1.6	-1.6	0.4	2.4	-1.6	-1.6	8.4	-3.6	-2.6	-0.975	-0.975	0.025	-0.975	1.025	1.025	-0.975	1.025	1.025	1.025	2.025	-0.975	0.025	0.025	-0.975	1.025	-2.975	-3.975	-1.975	-1.975	2.4	-0.6	-0.6	0.4	0.4	2.4	-0.6	2.4	-0.6
AT1G67530 decoy	-1.975	0.025	1.025	2.025	-0.975	-0.975	-4.975	-1.975	0.025	-0.975	2.025	1.025	0.025	-0.975	-0.975	-1.975	0.025	1.025	-2.975	6.025	-2.975	1.025	-1.975	0.025	-1.975	-2.975	-0.975	-0.975	1.025	0.025	-2.975	-1.975	1.025	1.025	-1.975	-4.975	-1.975	-0.975	0.025	4.025	1.025	2.025	2.025	-0.975	-0.975	-0.975	1.025	-0.975	2.025
AT1G23030 decoy	0.025	-2.975	1.025	-3.975	2.025	0.025	2.025	1.025	0.025	2.025	-0.975	2.025	0.025	0.025	-0.975	1.025	0.025	1.025	-0.975	2.025	1.025	1.025	0.025	1.025	-1.975	0.025	2.025	0.025	1.025	2.025	7.025	-1.975	0.025	-0.975	0.025	0.025	0.025	0.025
AT3G46510 decoy	-1.975	1.025	0.025	-0.975	2.025	1.025	-2.975	-1.975	1.025	0.025	0.025	-2.975	1.025	-1.975	-2.975	0.025	2.025	0.025	-0.975	-1.975	2.025	2.025	-0.975	0.025	-2.975	-3.975	2.025	1.025	-1.975	0.025	-0.975	-0.975
AT3G54850 decoy	1.3	0.3	0.3	1.3	0.3	1.3	1.3	-2.7	2.3	0.3	2.3	1.3	1.3	0.3	-0.7	-2.7	-3.7	2.3	1.3	-0.7	2.3	3.3	-0.7	1.3	-0.7	-1.7	-0.7	1.3	0.3	-0.7	2.3	3.3	3.3	0.3	0.3	3.3	1.3	1.3	1.3	-0.7	1.3	4.3	0.3	2.3	0.3	18.3	3.3	1.3	5.3
AT1G29340 decoy	3.725	1.725	-1.275	1.725	3.725	-0.275	0.725	0.725	3.725	0.725	-3.275	-4.275	0.725	5.725	1.725	1.725	0.725	0.725	-3.275	0.725	-0.529412	0.470588
AT1G10560 decoy	2.025	3.025	0.025	2.025	1.025	0.025	1.025	1.025	1.025	4.025	1.025	0.025	0.025	0.025	0.025	-0.975	0.025	-0.975	-0.975	-0.975	1.025	-0.975	-0.975	0.025	-0.975	0.025	-1.975	-0.975	0.025	0.025	-1.975	1.025	-0.975	3.025	-1.975	0.025	0.025	2.025	1.47059	-0.529412	2.47059	-1.52941	2.47059	-1.52941	-0.529412	1.47059	-0.529412	-0.529412	-0.529412
AT1G66160 decoy	-0.975	1.025	4.025	3.025	1.025	0.025	2.025	1.025	0.025	4.025	1.025	0.025	1.025	0.025	-1.975	-1.975	0.025	1.025	0.025	-1.975	2.025	-1.975	-0.975	3.025	0.025	0.025	3.025	1.025	-0.975	2.025	0.025	1.025	0.025	-0.975	0.025	0.025	1.025	1.025
AT5G37490 decoy	0.025	1.025	-0.975	-0.975	-0.975	-1.975	1.025	-0.975	1.025	-0.975	2.025	1.025	-0.975	0.025	1.025	0.025	-1.975	-1.975	-1.975	1.025	2.025	-0.975	1.025	2.025	0.025	1.025	3.025	5.025	0.025	5.025	1.025	0.025	3.025	-0.975	-0.975	-0.975	-1.975	0.025	-0.975	-0.975
AT3G52450 decoy	2.725	1.725	0.725	1.725	0.725	1.725	-2.275	-1.275	0.725	1.725	0.725	0.725	3.725	1.725	-0.275	-0.275	2.725	0.725	0.725	0.725	-2.975	-0.975	-0.975	2.025	1.025	1.025	1.025	4.025	1.025	2.025	3.025	2.025	2.025	-1.975	0.025	-1.975	1.025	2.025	0.025
AT2G35930 decoy	-1.52941	-0.529412	-2.52941	-3.52941	-1.52941	0.470588	0.470588	1.47059	-0.529412	-1.52941	-0.529412	-1.52941	-2.52941	-2.52941
AT3G11840 decoy	3.725	1.725	2.725	-2.275	-0.275	-0.275	-0.275	0.725	0.725	-1.275	2.725	3.725	-0.275	-1.275	2.725	0.725	-3.275	-2.275	-2.275	-3.275	1.725	3.725	2.725	1.725	1.725	0.725	-1.275	0.725	-0.6	3.4	1.4	0.4	3.4	-0.6	0.4	2.4	1.4	1.4	5.4	-0.6	1.4	1.4	-1.6	-0.6	0.4	-1.6	-0.6	0.4
AT3G19380 decoy	0.725	0.725	3.725	1.725	0.725	0.725	-2.275	0.725	1.725	-1.275	3.725	10.725	1.725	-0.275	1.725	-1.275	0.725	0.725	1.725	1.725	-0.975	-0.975	-1.975	-1.975	-0.975	-0.975	21.025	0.025	-0.975	-1.975	-1.975	1.025	-0.975	-0.975	-0.975	0.025	0.025	-0.975	-0.975	1.025
AT1G49780 decoy	0.3	2.3	1.3	2.3	1.3	3.3	1.3	3.3	3.3	3.3	2.3	2.3	1.3	3.3	1.3	1.3	0.3	-1.7	3.3	1.3	2.3	1.3	4.3	0.3	3.3	-0.7	1.3	2.3	2.3	0.3	1.3	1.3	-1.7	-1.7	-0.7	1.3	-0.7	0.3	0.3	1.3
AT5G64660 decoy	1.025	1.025	2.025	1.025	2.025	1.025	3.025	3.025	0.025	0.025	-0.975	3.025	1.025	1.025	0.025	-0.975	1.025	-1.975	-0.975	0.025	2.725	0.725	-1.275	-2.275	-1.275	2.725	3.725	1.725	-1.275	1.725	1.725	1.725	-0.275	1.725	0.725	-0.275	-0.275	1.725	0.725	1.725
AT5G09800 decoy	-3.275	0.725	0.725	-4.275	0.725	-3.275	-0.275	-0.275
AT3G18710 decoy	1.725	2.725	-2.275	-3.275	1.725	-4.275	-1.275	1.725	1.725	1.725	-2.275	-0.275	1.725	-1.275	0.725	0.725	-2.275	-1.275	-2.275	-0.275
AT3G49810 decoy	-1.275	2.725	-2.275	2.725	-2.275	-1.275	-1.275	-2.275	-1.275	-2.275	0.725	2.725	3.725	-4.275	0.725	-4.275	-2.275	1.725	1.725	-1.275	0.475	1.475	0.475	2.475	0.475	1.475	2.475	-0.525	0.475	0.475	-1.525	1.475	0.475	0.475	0.475	0.475	1.475	2.475	2.475	0.475
AT5G65920 decoy	-1.275	1.725	1.725	1.725	-2.275	4.725	1.725	-3.275	0.725	1.725	-2.275	1.725	2.725	-1.275	0.725	2.725	-2.275	-1.275	2.725	0.725	2.725	2.725	0.725	0.725	0.725	0.725	3.725	0.725	3.725	0.725	2.725	3.725	0.725	2.725	-2.275	1.725	3.725	2.725
AT3G49060 decoy	2.61538	2.61538	-0.38462	1.61539	0.615385	2.61538	1.61539	-0.38462	1.61539	1.61539	0.615385	1.61539	-0.38462	1.61539	2.61538	1.61539	-0.38462	1.61539	-0.38462	0.615385
AT2G45910 decoy	0.725	2.725	-1.275	1.725	-1.275	2.725	-1.275	1.725	2.725	0.725	1.725	0.725	-0.275	-1.275	1.725	1.725	1.725	1.725	-0.275	2.725
AT3G61390 decoy	1.725	0.725	2.725	3.725	-0.275	-1.275	0.725	0.725	2.725	-1.275	-1.275	-0.275	-2.275	2.725	-2.275	0.725	-0.275	1.725	0.725	2.725
AT2G45920 decoy	3.61538	-1.38462	0.615385	-0.38462	1.61539	0.615385	-0.38462	0.615385	1.61539	1.61539	1.61539	1.61539	1.61539	2.61538	1.61539	4.61538	-1.38462	0.615385	-1.38462	1.61539
AT5G65200 decoy	10.4706	-1.52941	-2.52941	2.47059	-2.52941	-3.52941	-2.52941	-3.52941	-3.52941	-1.52941	-4.52941
AT3G47820 decoy	0.615385	3.61538	3.61538	1.61539	1.61539	-5.38462	-3.38462	-1.38462	2.61538	-5.38462	0.615385	-1.38462	-1.38462	-4.38462	2.61538	-4.38462	-1.38462	-0.38462	0.615385	2.61538	-2.52941	-2.52941
AT5G40140 decoy	3.725	0.725	3.725	-1.275	0.725	-1.275	2.725	-1.275	1.725	2.725	-1.275	-0.275	0.725	2.725	-1.275	-5.275	-2.275	-0.275	-1.275	-0.525	-1.525	-1.525	-1.525	1.475	-2.525	0.475	1.475	0.475	0.475	1.475	-1.525	0.475	0.475	1.475	-1.525	1.475	-0.525	-0.525	-1.525
AT5G62560 decoy	1.61539	2.61538	3.61538	0.615385	1.61539	-0.38462	-0.38462	-1.38462	0.615385	3.61538	-0.38462	1.61539	-0.38462	-0.38462	-0.38462	2.61538	-0.38462	2.61538	0.615385	-0.38462
AT1G20780 decoy	6.47059	-0.529412	-5.52941	-3.52941	-2.52941	-2.52941	-3.52941	-3.52941
AT1G27910 decoy	-0.38462	-1.38462	-1.38462	-2.38462	-2.38462	-1.38462	-2.38462	-0.38462	-2.38462	-2.38462	-1.525	-1.525	-0.525	-1.525	0.475	1.475	0.475	0.475	-1.525	0.475	-0.525	-1.525	-0.525	1.475	2.475	-0.525	-1.525	0.475	1.475	0.475
AT5G18320 decoy	0.725	-2.275	-0.275	-0.275	-3.275	1.725	5.725	0.725	-0.275	-2.275	-1.275	-3.275	-0.275	-0.525	1.475	-2.525	-1.525	1.475	4.475	-0.525	0.475	-0.525	0.475	-1.525	2.475	-0.525	-0.525	1.475	-0.525	-0.525	0.475	-0.525	0.475
AT5G18330 decoy	0.725	-0.275	-1.275	-1.275	-1.275	1.725	-1.275	-1.275	-2.275	2.725	0.725	-1.275	-0.275	-2.275	-2.275	-3.275	-2.275	-2.275	-2.275	-2.275	0.615385	-0.38462	0.615385	1.61539	0.615385	1.61539	-1.38462
AT5G18340 decoy	5.725	-1.275	2.725	-0.275	1.725	2.725	-1.275	-3.275	1.725	0.725	-0.275	1.725	-1.275	-2.275	0.725	-0.275	-1.275	-1.275	-2.275	-1.275	1.475	3.475	1.475	0.475	-0.525	-0.525	0.475	2.475	1.475	-0.525	0.475	-0.525	1.475	-0.525	2.475	-1.525	2.475	-2.525	0.475	1.475	-5.52941	-3.52941	-2.52941	-4.52941	-2.52941	-5.52941	-2.52941	-2.52941	-5.52941
AT5G67530 decoy	-0.38462	-0.38462	-0.38462	-1.38462	-2.38462	-0.38462	-0.38462	1.61539	0.615385	1.61539	1.61539	-0.38462	1.61539	2.61538	2.61538	1.61539	1.61539	1.61539	-0.38462	-0.38462	0.615385	0.615385	0.615385	-1.38462	-0.38462	-1.38462	-1.38462	1.61539	6.61538	3.61538	1.61539	-0.38462	-1.38462	-1.38462	2.61538	3.61538	2.61538	-1.38462	0.615385	-0.38462
AT5G65500 decoy	0.615385	1.61539	2.61538	1.61539	-0.38462	0.615385	-0.38462	0.615385	1.61539	2.61538	0.615385	1.61539	0.615385	0.615385	1.61539	-0.38462	2.61538	3.61538	1.61539	0.615385
AT5G61560 decoy	0.475	-0.525	0.475	0.475	0.475	-0.525	-1.525	-0.525	-1.525	-0.525	-1.38462	-0.38462	-0.38462	-2.38462	-2.38462	-0.38462
AT1G01680 decoy	2.475	3.475	0.475	2.475	3.475	0.475	1.475	2.475	0.475	0.475	1.475	3.475	2.475	-1.525	0.475	1.475	0.475	-1.525	3.475	1.475	0.615385	-1.38462	-1.38462	1.61539	1.61539	-1.38462	-2.38462	-1.38462
AT1G01670 decoy	1.475	2.475	-0.525	-1.525	0.475	-0.525	0.475	-0.525	-0.525	-1.525	1.475	1.475	-0.525	-0.525	1.475	-0.525	1.475	-0.525	-1.525	0.475	0.475	0.475	0.475	-0.525	0.475	1.475	-0.525	-0.525	2.475	-1.525	-3.38462	-2.38462	-1.38462	-2.38462	-1.38462	-1.38462	-0.38462	-0.38462	1.61539	-0.38462	-0.38462	1.61539	-1.38462	2.61538	-0.38462	1.61539
AT1G04510 decoy	-4.52941	-9.52941	-7.52941	8.47059	-4.52941	-2.52941	-6.52941	0.470588	-3.52941	-1.52941	-3.52941	-2.52941	-4.52941	-5.52941	-2.52941	-4.52941	-2.52941	0.470588	-3.52941	-5.52941	-0.529412	0.470588	-1.52941	-2.52941	-1.52941	-6.52941	0.470588	-3.52941
AT2G33340 decoy	0.65	1.65	-0.35	3.65	0.65	2.65	-0.35	0.65	5.65	-0.35	2.65	-1.35	1.65	-0.35	1.65	-0.35	1.65	1.65	0.65	5.65	-1.35	-0.35	0.65	4.65	1.65	-0.35	0.65	-1.35	1.65	-2.35	2.65	1.65	-2.35	-1.35	-0.35	-1.35	-0.35	0.65	-0.35	1.65
AT3G07370 decoy	-2.52941	-2.52941	-1.52941	-3.52941	-1.52941	-2.52941	-5.52941	1.47059	-2.52941	0.470588	-3.52941	-2.52941	-1.52941	-1.52941	-2.52941	-3.52941
WT 1	-2.35	1.65	1.65	0.65	-0.35	-1.35	2.65	-1.35	1.65	-0.35	0.65	-0.35	-0.35	0.65	-0.35	-1.35	0.65	-2.35	-0.35	0.65
WT 2	0.725	0.725	-1.275	-0.275	-2.275	-3.275	1.725	0.725	1.725	-2.275	-2.275	-1.275	-2.275	-1.275	-1.275	-2.275	0.725	-1.275	1.725	0.725
WT 3	-1.275	-3.275	0.725	-1.275	1.725	-1.275	2.725	0.725	0.725	-0.275	-0.275	2.725	0.725	1.725	2.725	0.725	1.725	-0.275	1.725	1.725
WT 4	0.025	1.025	3.025	2.025	2.025	1.025	2.025	1.025	0.025	-1.975	0.025	0.025	1.025	-1.975	0.025	-0.975	0.025	-1.975	-1.975	0.025
WT 5	1.025	1.025	-2.975	-0.975	-0.975	0.025	1.025	0.025	-0.975	1.025	-1.975	5.025	-3.975	-0.975	0.025	-1.975	1.025	2.025	-1.975	0.025
WT 6	0.475	0.475	0.475	0.475	0.475	-0.525	0.475	-0.525	0.475	0.475	-1.525	-1.525	-0.525	-0.525	0.475	0.475	1.475	0.475	0.475	-0.525
WT 7	-0.525	-2.525	-1.525	0.475	0.475	0.475	0.475	-0.525	0.475	1.475	-0.525	2.475	-1.525	-1.525	-0.525	-0.525	0.475	-1.525	2.475	0.475
WT 8	0.615385	1.61539	-1.38462	-0.38462	-0.38462	-0.38462	1.61539	0.615385	0.615385	2.61538	-0.38462	-0.38462	-1.38462	-3.38462	-1.38462	-0.38462	1.61539	-1.38462	0.615385
WT 9	0.615385	0.615385	0.615385	-1.38462	-0.38462	0.615385	-1.38462	1.61539	-0.38462	-0.38462	-1.38462	-1.38462	-0.38462	0.615385	0.615385	0.615385	-0.38462	1.61539	0.615385	0.615385
WT 10	-0.7	-0.7	-0.7	-1.7	1.3	0.3	-0.7	0.3	0.3	-0.7	1.3	1.3	0.3	-0.7	-0.7	-1.7	1.3	1.3	0.3	0.3
WT 11	-0.6	0.4	1.4	-0.6	1.4	0.4	0.4	-0.6	-0.6	-0.6	1.4	-0.6	-0.6	-1.6	-1.6	3.4	0.4	-1.6	-0.6	0.4
WT 12	-2.52941	-0.529412	-3.52941	4.47059	7.47059	9.47059	-3.52941	1.47059	-1.52941	-0.529412	-1.52941	-1.52941	-2.52941	-0.529412	-1.52941	-2.52941	-0.529412
Genotype	Normalized Age at Bolting (Fig 2, Fig S3B)
AT5G67340 decoy	0.5	2.5	0.5	1.5	2.5	0.5	0.5	-0.5	5.5	0.5	-0.5	-0.5	-0.5	1.5	2.5	2.5	1.5	6.5	-1.5	0.5	-1.025	-2.025	-2.025	0.975	1.975	-0.025	0.975	-0.025	-1.025	-0.025	0.975	-1.025	0.975	0.975	0.975	-0.025	1.975	6.975	-4.025	5.975	3.5	0.5	-0.5	2.5	2.5	4.5	-0.5	2.5	0.5
AT1G67530 decoy	-2.025	-1.025	-1.025	7.975	-1.025	-2.025	-1.025	0.975	-1.025	-1.025	6.975	-3.025	-1.025	-5.025	-2.025	-3.025	-0.025	0.975	-4.025	4.975	3.975	2.975	1.975	-1.025	-4.025	-0.025	-0.025	-1.025	4.975	4.975	-1.025	0.975	-1.025	0.975	-5.025	-0.025	-2.025	0.975	-2.025	10.975	-0.025	-1.025	-0.025	7.975	-1.025	-0.025	-1.025	-2.025	0.975
AT1G23030 decoy	1.975	-2.025	5.975	-5.025	3.975	0.975	3.975	0.975	0.975	0.975	-0.025	0.975	1.975	-1.025	1.975	0.975	-1.025	-0.025	-0.025	0.975	-1.025	0.975	-0.025	-0.025	-2.025	0.975	-0.025	-1.025	0.975	0.975	6.975	-2.025	1.975	-2.025	-0.025	-2.025	0.975	-0.025
AT3G46510 decoy	-1.025	0.975	0.975	0.975	7.975	0.975	-5.025	2.975	-1.025	-2.025	-1.025	-0.025	1.975	-3.025	-3.025	0.975	10.975	-1.025	-2.025	-1.025	6.975	3.975	-0.025	-0.025	-3.025	-1.025	2.975	1.975	0.975	0.975	2.975	2.975
AT3G54850 decoy	1.85	-0.15	5.85	1.85	1.85	0.85	0.85	2.85	2.85	3.85	0.85	0.85	-0.15	0.85	-2.15	-2.15	-3.15	0.85	-0.15	-1.15	2.85	3.85	0.85	3.85	-0.15	1.85	1.85	2.85	3.85	-0.15	3.85	2.85	2.85	0.85	2.85	3.85	2.85	1.85	2.85	0.85	1.85	1.85	-0.15	4.85	1.85	6.85	2.85	1.85	5.85
AT1G29340 decoy	3.025	1.025	-1.975	3.025	0.025	0.025	0.025	2.025	3.025	2.025	-3.975	-4.975	1.025	5.025	4.025	1.025	1.025	1.025	-0.975	4.025	-1.82353	-1.82353
AT1G10560 decoy	-0.025	0.975	1.975	-0.025	0.975	0.975	-0.025	-0.025	-0.025	3.975	2.975	0.975	0.975	2.975	0.975	1.975	-0.025	0.975	-1.025	-3.025	0.975	1.975	-0.025	-0.025	0.975	0.975	-2.025	-1.025	-1.025	-2.025	-1.025	1.975	-3.025	4.975	-5.025	0.975	0.975	0.975	-1.82353	0.176471	1.17647	-0.823529	-0.823529	1.17647	-1.82353	-1.82353	0.176471	1.17647	0.176471
AT1G66160 decoy	-1.025	-0.025	1.975	4.975	-0.025	8.975	0.975	9.975	0.975	2.975	-0.025	-2.025	0.975	4.975	3.975	-2.025	9.975	2.975	2.975	-2.025	0.975	-5.025	-6.025	-0.025	-3.025	-1.025	1.975	-0.025	-2.025	-0.025	-0.025	1.975	-2.025	-2.025	-0.025	-1.025	-1.025	-0.025
AT5G37490 decoy	-1.025	-1.025	-1.025	-1.025	-4.025	0.975	-0.025	1.975	1.975	-1.025	-0.025	-2.025	-3.025	-0.025	-1.025	-2.025	-1.025	-5.025	-5.025	-3.025	1.975	-1.025	0.975	0.975	-0.025	-0.025	2.975	3.975	0.975	2.975	-0.025	0.975	-0.025	0.975	1.975	1.975	0.975	-0.025	1.975	1.975
AT3G52450 decoy	2.025	0.025	0.025	0.025	0.025	1.025	-3.975	-0.975	0.025	0.025	0.025	1.025	2.025	1.025	-1.975	-0.975	3.025	0.025	1.025	1.025	-4.025	-2.025	-1.025	2.975	-1.025	1.975	-0.025	2.975	-0.025	4.975	3.975	2.975	-0.025	-1.025	-0.025	-2.025	-0.025	3.975	4.975
AT2G35930 decoy	-1.82353	0.176471	0.176471	1.17647	-1.82353	-0.823529	-0.823529	1.17647	-0.823529	-1.82353	-3.82353	-1.82353	1.17647	-1.82353
AT3G11840 decoy	2.025	1.025	2.025	-2.975	1.025	0.025	1.025	2.025	2.025	0.025	9.025	3.025	1.025	5.025	5.025	1.025	-2.975	-2.975	-1.975	-2.975	1.025	5.025	5.025	6.025	0.025	2.025	-0.975	0.025	1.5	2.5	2.5	0.5	3.5	-1.5	0.5	1.5	1.5	0.5	4.5	-0.5	2.5	1.5	-0.5	-0.5	0.5	-0.5	0.5	4.5
AT3G19380 decoy	1.025	1.025	5.025	4.025	0.025	0.025	-3.975	1.025	0.025	-0.975	5.025	15.025	1.025	-0.975	0.025	-0.975	2.025	0.025	3.025	4.025	-1.025	-1.025	-0.025	-1.025	-3.025	-1.025	25.975	-2.025	1.975	0.975	-0.025	0.975	-0.025	-1.025	0.975	-0.025	0.975	0.975	-0.025	1.975
AT1G49780 decoy	-0.15	1.85	-0.15	1.85	1.85	0.85	-0.15	2.85	2.85	1.85	1.85	1.85	-0.15	0.85	1.85	0.85	-2.15	-0.15	0.85	0.85	0.85	-0.15	2.85	0.85	9.85	-0.15	-0.15	0.85	1.85	-0.15	0.85	-0.15	-2.15	0.85	28.85	-0.15	-3.15	2.85	0.85	1.85
AT5G64660 decoy	4.975	-0.025	0.975	-0.025	0.975	4.975	1.975	1.975	0.975	0.975	0.975	5.975	0.975	0.975	-1.025	-1.025	-1.025	0.975	4.975	0.975	3.025	1.025	-1.975	-2.975	-0.975	3.025	6.025	1.025	-1.975	4.025	3.025	3.025	3.025	5.025	4.025	0.025	3.025	2.025	1.025	2.025
AT5G09800 decoy	-0.975	0.025	0.025	-1.975	1.025	-1.975	1.025	1.025
AT3G18710 decoy	0.025	1.025	-3.975	-2.975	4.025	-0.975	-1.975	1.025	3.025	6.025	-0.975	2.025	5.025	-2.975	-0.975	2.025	-1.975	-1.975	-0.975	0.025
AT3G49810 decoy	-0.975	2.025	-2.975	3.025	-4.975	-0.975	-2.975	-0.975	-2.975	-1.975	0.025	1.025	4.025	-2.975	1.025	-3.975	-4.975	3.025	0.025	-1.975	0.75	3.75	1.75	4.75	3.75	2.75	4.75	-0.25	2.75	6.75	4.75	3.75	1.75	0.75	0.75	6.75	4.75	1.75	2.75	1.75
AT5G65920 decoy	1.025	3.025	3.025	3.025	-2.975	7.025	1.025	-0.975	2.025	3.025	2.025	2.025	3.025	-0.975	3.025	4.025	-0.975	-1.975	3.025	3.025	3.025	3.025	1.025	4.025	3.025	0.025	3.025	3.025	4.025	2.025	4.025	4.025	2.025	4.025	3.025	2.025	5.025	4.025
AT3G49060 decoy	0.769231	1.76923	-1.23077	5.76923	0.769231	2.76923	1.76923	-2.23077	1.76923	-0.23077	0.769231	-0.23077	-1.23077	-0.23077	0.769231	1.76923	-0.23077	-0.23077	-2.23077	0.769231
AT2G45910 decoy	4.025	3.025	-1.975	2.025	-1.975	1.025	-1.975	0.025	1.025	2.025	0.025	1.025	-0.975	-1.975	3.025	1.025	1.025	0.025	2.025	3.025
AT3G61390 decoy	0.025	-0.975	0.025	0.025	-1.975	-0.975	-0.975	1.025	0.025	-1.975	-1.975	-1.975	-1.975	2.025	-4.975	0.025	-2.975	1.025	2.025	3.025
AT2G45920 decoy	2.76923	0.769231	-0.23077	1.76923	1.76923	-0.23077	-1.23077	0.769231	0.769231	2.76923	0.769231	0.769231	1.76923	0.769231	0.769231	1.76923	0.769231	0.769231	-0.23077	1.76923
AT5G65200 decoy	2.17647	-0.823529	-1.82353	6.17647	0.176471	0.176471	1.17647	-0.823529	-1.82353	3.17647	-0.823529
AT3G47820 decoy	2.76923	1.76923	2.76923	0.769231	0.769231	-2.23077	0.769231	-1.23077	2.76923	8.76923	0.769231	0.769231	0.769231	3.76923	0.769231	1.76923	-1.23077	2.76923	1.76923	2.76923	-0.823529	-0.823529
AT5G40140 decoy	7.025	-0.975	1.025	-2.975	-0.975	-2.975	0.025	-2.975	0.025	2.025	-1.975	-1.975	-0.975	0.025	-2.975	-5.975	-2.975	-1.975	-1.975	-3.25	-4.25	-4.25	-4.25	2.75	-2.25	0.75	0.75	-0.25	-1.25	3.75	-2.25	-0.25	0.75	1.75	-0.25	5.75	-0.25	-0.25	-0.25
AT5G62560 decoy	-1.23077	2.76923	1.76923	-1.23077	1.76923	-1.23077	-2.23077	0.769231	0.769231	1.76923	0.769231	5.76923	-0.23077	-1.23077	0.769231	3.76923	-1.23077	2.76923	1.76923	-2.23077
AT1G20780 decoy	2.17647	-0.823529	0.176471	-2.82353	-2.82353	0.176471	-0.823529	1.17647
AT1G27910 decoy	-1.23077	-0.23077	-1.23077	-0.23077	0.769231	1.76923	0.769231	5.76923	-2.23077	-0.23077	-1.25	-1.25	-2.25	-2.25	-0.25	1.75	1.75	-1.25	-2.25	1.75	-2.25	-1.25	-1.25	-0.25	3.75	-2.25	-2.25	-0.25	1.75	0.75
AT5G18320 decoy	0.025	-1.975	-1.975	-0.975	-2.975	1.025	7.025	4.025	-0.975	-1.975	-0.975	-3.975	-1.975	-1.25	0.75	-0.25	-3.25	-0.25	0.75	-0.25	-1.25	-1.25	-1.25	-4.25	-0.25	-4.25	-3.25	0.75	-1.25	-2.25	0.75	-3.25	0.75
AT5G18330 decoy	0.025	-1.975	-0.975	-1.975	-1.975	0.025	-0.975	-1.975	-4.975	1.025	0.025	-0.975	-0.975	-4.975	-3.975	-3.975	-1.975	-3.975	-2.975	-3.975	1.76923	-1.23077	0.769231	-0.23077	7.76923	3.76923	2.76923
AT5G18340 decoy	7.025	-0.975	2.025	-0.975	1.025	2.025	-0.975	-2.975	1.025	2.025	0.025	0.025	-1.975	-3.975	3.025	1.025	-1.975	-0.975	-3.975	-1.975	1.75	2.75	0.75	4.75	-0.25	-0.25	-0.25	1.75	6.75	6.75	2.75	-0.25	1.75	-2.25	2.75	-0.25	2.75	-0.25	-1.25	2.75	0.176471	-1.82353	-0.823529	5.17647	-0.823529	0.176471	-0.823529	0.176471	2.17647
AT5G67530 decoy	-0.23077	0.769231	-2.23077	-1.23077	-2.23077	-0.23077	-0.23077	1.76923	-0.23077	2.76923	1.76923	-1.23077	0.769231	0.769231	1.76923	0.769231	0.769231	2.76923	-2.23077	-1.23077	-1.23077	0.769231	3.76923	-2.23077	1.76923	1.76923	-2.23077	0.769231	6.76923	2.76923	0.769231	2.76923	-2.23077	-0.23077	0.769231	3.76923	3.76923	-2.23077	1.76923	-2.23077
AT5G65500 decoy	-0.23077	0.769231	1.76923	0.769231	-0.23077	0.769231	0.769231	0.769231	0.769231	0.769231	-0.23077	-0.23077	0.769231	15.7692	-1.23077	-2.23077	1.76923	-0.23077	0.769231	2.76923
AT5G61560 decoy	-0.25	-1.25	-0.25	-0.25	1.75	-1.25	-3.25	-0.25	4.75	0.75	-1.23077	-0.23077	0.769231	-2.23077	0.769231	3.76923
AT1G01680 decoy	4.75	1.75	0.75	1.75	1.75	-2.25	-0.25	2.75	-2.25	-0.25	2.75	2.75	4.75	0.75	-1.25	2.75	-1.25	3.75	2.75	0.75	-1.23077	-2.23077	0.769231	-0.23077	2.76923	0.769231	4.76923	1.76923
AT1G01670 decoy	3.75	-0.25	-1.25	-3.25	1.75	-0.25	1.75	1.75	-0.25	-2.25	-0.25	0.75	-2.25	-2.25	-0.25	-2.25	1.75	-1.25	-1.25	0.75	-0.25	0.75	-1.25	-0.25	0.75	0.75	-0.25	-0.25	1.75	-2.25	2.76923	-2.23077	-1.23077	0.769231	1.76923	2.76923	0.769231	1.76923	2.76923	-2.23077	-1.23077	1.76923	-2.23077	2.76923	-1.23077	2.76923
AT1G04510 decoy	0.176471	3.17647	1.17647	3.17647	-0.823529	1.17647	2.17647	-0.823529	0.176471	-0.823529	0.176471	-0.823529	-2.82353	1.17647	-4.82353	-4.82353	-3.82353	-1.82353	0.176471	0.176471	-0.823529	-0.823529	-0.823529	1.17647	-0.823529	0.176471	9.17647	5.17647
AT2G33340 decoy	-0.6	-0.6	-0.6	-0.6	4.4	4.4	2.4	-0.6	7.4	3.4	3.4	-2.6	2.4	-1.6	-0.6	-0.6	1.4	1.4	-0.6	7.4	-2.6	-0.6	-0.6	7.4	2.4	1.4	3.4	2.4	3.4	-0.6	4.4	-0.6	-1.6	-1.6	0.4	0.4	-0.6	1.4	0.4	2.4
AT3G07370 decoy	2.17647	0.176471	0.176471	0.176471	0.176471	0.176471	0.176471	-0.823529	1.17647	-0.823529	0.176471	-2.82353	-1.82353	-1.82353	0.176471	-1.82353
WT 1	-1.6	0.4	1.4	-0.6	0.4	1.4	2.4	-0.6	1.4	1.4	0.4	-2.6	-0.6	-0.6	0.4	-0.6	-0.6	-3.6	-1.6	3.4
WT 2	0.025	2.025	-1.975	-1.975	-0.975	-2.975	1.025	2.025	0.025	-1.975	-1.975	-1.975	-2.975	-0.975	-1.975	-0.975	0.025	-0.975	0.025	1.025
WT 3	-0.975	-2.975	1.025	-0.975	2.025	-0.975	2.025	0.025	0.025	0.025	1.025	3.025	1.025	1.025	4.025	2.025	3.025	0.025	1.025	0.025
WT 4	-1.025	-3.025	-0.025	0.975	-0.025	-0.025	-0.025	-1.025	-0.025	-2.025	-0.025	-2.025	-0.025	-2.025	-0.025	0.975	6.975	1.975	-1.025	2.975
WT 5	-1.025	0.975	-2.025	-2.025	-2.025	-0.025	-1.025	0.975	-2.025	-1.025	-2.025	3.975	-1.025	-1.025	1.975	3.975	2.975	0.975	-0.025	-2.025
WT 6	1.75	-0.25	1.75	-1.25	1.75	-2.25	-0.25	-1.25	-0.25	-0.25	1.75	-1.25	-0.25	-1.25	1.75	-0.25	2.75	0.75	0.75	1.75
WT 7	-0.25	-3.25	-2.25	0.75	-1.25	-0.25	-0.25	-2.25	-1.25	2.75	-1.25	-0.25	-1.25	-2.25	-2.25	3.75	0.75	-0.25	2.75	1.75
WT 8	1.76923	1.76923	0.769231	1.76923	-1.23077	-2.23077	-0.23077	-0.23077	-1.23077	2.76923	-1.23077	-0.23077	-2.23077	1.76923	-1.23077	-1.23077	-0.23077	-0.23077	1.76923
WT 9	0.769231	-0.23077	-0.23077	-2.23077	-1.23077	1.76923	-2.23077	0.769231	-2.23077	-2.23077	-1.23077	0.769231	-2.23077	2.76923	0.769231	1.76923	0.769231	0.769231	-1.23077	3.76923
WT 10	-0.15	-1.15	-0.15	-2.15	1.85	-0.15	-2.15	-0.15	0.85	-0.15	0.85	1.85	0.85	-2.15	-0.15	-0.15	2.85	-0.15	-0.15	-0.15
WT 11	-0.5	0.5	0.5	-0.5	0.5	0.5	1.5	-0.5	-0.5	-0.5	3.5	-1.5	-1.5	-1.5	-1.5	4.5	-0.5	-3.5	0.5	0.5
WT 12	2.17647	-1.82353	2.17647	4.17647	3.17647	4.17647	0.176471	-0.823529	-1.82353	-2.82353	-1.82353	1.17647	-2.82353	-1.82353	0.176471	-2.82353	-0.823529
Genotype	Normalized Anthesis Delay (Fig S1, S3C)
AT5G67340 decoy	-0.5	0.5	-0.5	-0.5	-0.5	0.5	-0.5	1.5	-1.5	0.5	0.5	-0.5	0.5	-0.5	-0.5	-0.5	-0.5	-0.5	-1.5	-0.5	0.2	0.2	0.2	1.2	0.2	0.2	-0.8	0.2	-0.8	-1.8	0.2	-0.8	0.2	1.2	-0.8	-0.8	2.2	5.2	8.2	0.2	-0.5	-0.5	-0.5	-0.5	-0.5	-0.5	-0.5	0.5	-0.5
AT1G67530 decoy	0.2	-0.8	0.2	0.2	-0.8	0.2	1.2	-0.8	0.2	-0.8	1.2	-0.8	-0.8	5.2	-0.8	1.2	-0.8	5.2	1.2	0.2	2.2	3.2	2.2	1.2	10.2	1.2	0.2	0.2	2.2	1.2	-0.8	0.2	0.2	0.2	4.2	1.2	0.2	0.2	3.2	0.2	4.2	-0.8	-0.8	0.2	0.2	-0.8	-0.8	-0.8	0.2
AT1G23030 decoy	-0.25	-0.25	-0.25	4.75	-1.25	-0.25	-0.25	-1.25	-0.25	-0.25	-1.25	-0.25	0.75	-0.25	-1.25	-0.25	0.75	-0.25	0.75	-0.25	0.2	2.2	1.2	0.2	7.2	-2.8	1.2	1.2	-1.8	1.2	-6.8	9.2	-4.8	0.2	3.2	-0.8	5.2	-0.8	-2.8
AT3G46510 decoy	-0.25	-1.25	-0.25	-0.25	-0.25	0.75	5.75	1.75	-0.25	-0.25	-0.25	11.75	3.75	6.75	3.75	-0.25	-13.25	-0.25	4.75	2.75	-6.25	-4.25	2.75	11.75
AT3G54850 decoy	-0.1	0.9	-0.1	-0.1	0.9	-0.1	0.9	-0.1	-0.1	-0.1	-0.1	-1.1	-1.1	-0.1	0.9	-0.1	-0.1	-0.1	-1.1	-0.1	0.9	0.9	-0.1	-0.1	-0.1	-0.1	-0.1	-0.1	0.9	-0.1	-0.1	0.9	-0.1	-0.1	1.9	-0.1	-0.1	-0.1	0.9	-0.1	-0.1	-0.1	-0.1	-2.1	-0.1	0.9	-0.1	0.9	0.9
AT1G29340 decoy	-1	0	0	0	0	0	0	0	0	0	2	3	0	0	0	-1	0	0	0	-1	1.11765	0.117647
AT1G10560 decoy	-0.25	-0.25	-0.25	2.75	-0.25	1.75	-0.25	-1.25	-0.25	-1.25	-1.25	-0.25	0.75	-1.25	0.75	-0.25	-0.25	-0.25	-1.25	27.2	8.2	3.2	-0.8	-0.8	2.2	1.2	-2.8	2.2	1.2	0.2	1.2	3.2	-2.8	8.2	-4.8	6.2	0.2	0.2	-2.88235	2.11765	2.11765	-1.88235	0.117647	2.11765	-3.88235	1.11765	2.11765	1.11765	-1.88235
AT1G66160 decoy	-0.25	-0.25	-0.25	-1.25	-1.25	-1.25	-0.25	-0.25	-0.25	-0.25	0.75	-1.25	1.75	-1.25	-0.25	-1.25	-0.25	0.75	0.75	-1.25	2.75	6.75	0.75	0.75	0.75	0.75	-1.25	0.75	-0.25	0.75	-1.25	1.75	-1.25	-1.25	3.75	3.75	1.75	-0.25
AT5G37490 decoy	-0.8	1.2	0.2	0.2	5.2	-0.8	-0.8	-0.8	0.2	-0.8	1.2	0.2	0.2	1.2	0.2	0.2	0.2	4.2	1.2	0.2	1.75	-0.25	-0.25	0.75	-1.25	1.75	-0.25	-0.25	-0.25	-0.25	1.75	-0.25	-0.25	1.75	-1.25	-0.25	-0.25	-1.25	-1.25	-0.25
AT3G52450 decoy	0	0	1	0	0	1	1	1	0	0	1	0	0	0	0	0	0	0	1	0	-1.8	0.2	0.2	-0.8	-0.8	-0.8	-1.8	0.2	1.2	-0.8	1.2	2.2	-0.8	0.2	0.2	1.2	0.2	-0.8	2.2
AT2G35930 decoy	0.117647	0.117647	-0.882353	1.11765	0.117647	0.117647	0.117647	0.117647	0.117647	1.11765	0.117647	0.117647	1.11765	1.11765
AT3G11840 decoy	0	-1	-1	0	0	0	0	0	-1	0	-3	0	-1	0	0	0	3	2	0	2	0	0	-1	-1	1	0	0	2	-1.5	-0.5	0.5	-0.5	-0.5	0.5	-0.5	0.5	0.5	-0.5	-0.5	-0.5	0.5	1.5	1.5	-0.5	-0.5	-0.5	-0.5	-0.5
AT3G19380 decoy	0	-1	0	0	1	1	2	0	1	0	0	1	1	2	1	2	1	1	0	0.2	-0.8	1.2	0.2	0.2	0.2	-25.8	6.2	-1.8	0.2	2.2	0.2	0.2	3.2	0.2	-1.8	0.2	0.2	2.2
AT1G49780 decoy	-0.1	-1.1	-0.1	0.9	-0.1	-0.1	-0.1	-0.1	-0.1	-0.1	0.9	-0.1	0.9	-0.1	0.9	-0.1	-0.1	-1.1	-0.1	0.9	1.9	-0.1	0.9	-0.1	0.9	-1.1	-0.1	0.9	-1.1	-1.1	-0.1	-0.1	2.9	-1.1	-0.1	0.9	0.9	-0.1	0.9	-0.1
AT5G64660 decoy	-0.25	0.75	-0.25	-0.25	2.75	-1.25	-0.25	-0.25	0.75	-0.25	-0.25	-1.25	-0.25	0.75	-1.25	0.75	-0.25	-0.25	-0.25	0.75	0	1	1	1	2	0	-1	1	2	0	0	0	0	-1	-1	1	0	0	0	0
AT5G09800 decoy	0	-1	0	0	0	2	-1
AT3G18710 decoy	0	0	0	2	1	-1	-2	-1	-1	-1	-1	0	-1	-1	-2	0	-1	-2	0	0
AT3G49810 decoy	-1	-1	2	0	1	1	0	-1	0	0	0	-1	0	4	-1	3	2	0	1	0	0.25	0.25	1.25	1.25	0.25	0.25	0.25	1.25	0.25	-0.75	0.25	2.25	-0.75	0.25	0.25	6.25	-0.75	-0.75	0.25	-0.75
AT5G65920 decoy	0	0	0	0	1	-1	0	1	0	0	0	-1	-1	1	1	0	2	0	-1	0	0	0	1	0	0	1	1	-1	0	0	0	0	0	0	2	-1	0	0
AT3G49060 decoy	1.45	0.45	1.45	1.45	0.45	0.45	0.45	1.45	0.45	0.45	1.45	0.45	2.45	0.45	0.45	-0.55	-1.55	-0.55	0.45	1.45
AT2G45910 decoy	-1	0	0	0	1	0	1	0	-1	0	-1	0	0	0	0	-1	0	0	-2	0
AT3G61390 decoy	0	-1	-1	-1	-1	0	1	0	-1	-1	0	-1	-1	-1	1	-1	0	-1	-1	1
AT2G45920 decoy	-0.55	0.45	-0.55	0.45	0.45	-0.55	-0.55	0.45	-0.55	-0.55	-0.55	-0.55	0.45	0.45	-0.55	-0.55	-0.55	4.45	0.45	0.45
AT5G65200 decoy	-1.88235	0.117647	0.117647	0.117647	0.117647	-0.882353	1.11765	-0.882353	-0.882353	0.117647	-0.882353
AT3G47820 decoy	0.45	0.45	-0.55	0.45	1.45	0.45	1.45	0.45	-0.55	3.45	0.45	1.45	-0.55	-0.55	0.45	0.45	-0.55	-0.55	-1.55	0.45	0.117647	-0.882353
AT5G40140 decoy	-1	-1	0	0	-1	1	-1	0	0	0	0	0	0	-1	0	0	1	0	0	0	0.25	0.25	1.25	0.25	-1.75	0.25	1.25	1.25	-1.75	-0.75	0.25	0.25	-3.75	-4.75	0.25	1.25	-1.75	2.25	0.25
AT5G62560 decoy	0.45	0.45	1.45	0.45	0.45	0.45	0.45	1.45	1.45	0.45	0.45	1.45	-0.55	0.45	1.45	1.45	-0.55	0.45	0.45	1.45
AT1G20780 decoy	0.117647	0.117647	0.117647	0.117647	-0.882353	0.117647	-0.882353	2.11765
AT1G27910 decoy	0	-1	0	0	1	-1	1	-1	0	0	1.25	1.25	0.25	2.25	1.25	1.25	-0.75	1.25	-0.75	-0.75	0.25	-0.75	0.25	1.25	-0.75	1.25	0.25	1.25	6.25	4.25	-2.75
AT5G18320 decoy	1	1	1	1	1	1	-1	2	0	-1	0	0	0	0.25	-0.75	0.25	0.25	0.25	0.25	0.25	-0.75	-0.75	-0.75	0.25	0.25	0.25	0.25	0.25	0.25	0.25	0.25	4.25	0.25
AT5G18330 decoy	-1	-1	0	0	0	-1	-2	0	0	-1	0	-1	-1	0	0	-2	1	0	1	0	0.45	-0.55	0.45	-0.55	-0.55	-1.55	-0.55
AT5G18340 decoy	-2	3	-1	0	0	-1	-1	1	0	1	-1	-1	1	1	-1	-1	0	-1	1	0	1.45	-0.55	-0.55	6.45	-0.55	0.45	0.45	-0.55	2.45	-1.55	-1.55	0.45	0.45	1.45	0.45	-0.55	0.45	0.45	0.45	0.45	-0.882353	0.117647	-0.882353	-0.882353	-0.882353	-0.882353	0.117647	-0.882353	0.117647
AT5G67530 decoy	-1	-1	1	0	1	-1	-1	-1	0	-1	-1	0	-1	-1	-1	3	-1	-1	-1	0	0.45	0.45	-0.55	9.45	0.45	0.45	0.45	0.45	0.45	-0.55	1.45	1.45	2.45	0.45	1.45	-0.55	-0.55	0.45	0.45	1.45
AT5G65500 decoy	2.45	0.45	0.45	1.45	2.45	-0.55	1.45	-0.55	-0.55	1.45	-0.55	0.45	1.45	-15.55	-0.55	3.45	-1.55	1.45	1.45
AT5G61560 decoy	0.25	-0.75	0.25	-0.75	1.25	-0.75	0.25	0.25	0.25	3.25	0	0	-1	-2	0	-1
AT1G01680 decoy	0.45	0.45	0.45	-0.55	-0.55	0.45	0.45	0.45	-0.55	0.45	-0.55	-0.55	1.45	0.45	0.45	0.45	-0.55	0.45	-1.55	-0.55	4	2	-3	0	-3	0	-5	2	27
AT1G01670 decoy	0.25	-0.75	0.25	0.25	-1.75	0.25	-0.75	2.25	0.25	0.25	0.45	0.45	0.45	1.45	0.45	0.45	1.45	1.45	5.45	5.45	0.45	0.45	0.45	-0.55	0.45	0.45	-0.55	4.45	-0.55	0.45	0	-1	-1	-1	0	-1	0	0	-1	-1	-1	-1	-1	-1	0	-1
AT1G04510 decoy	-0.882353	2.11765	0.117647	0.117647	0.117647	1.11765	0.117647	0.117647	0.117647	0.117647	-0.882353	0.117647	0.117647	1.11765	1.11765	1.11765	0.117647	0.117647	0.117647	2.11765	0.117647	0.117647	0.117647	-0.882353	0.117647	2.11765	6.11765	1.11765
AT2G33340 decoy	1.15	1.15	0.15	4.15	0.15	-0.85	-0.85	0.15	0.15	-0.85	0.15	2.15	-0.85	1.15	1.15	0.15	2.15	1.15	0.15	0.15	0.15	1.15	1.15	0.15	-0.85	1.15	0.15	-1.85	0.15	1.15	0.15	2.15	1.15	1.15	0.15	0.15	0.15	1.15	0.15	1.15
AT3G07370 decoy	0.117647	1.11765	-0.882353	-0.882353	0.117647	-0.882353	-0.882353	0.117647	-0.882353	0.117647	-0.882353	1.11765	0.117647	1.11765	-0.882353	0.117647
WT 1	-0.85	-0.85	-0.85	0.15	-0.85	0.15	0.15	1.15	0.15	-0.85	0.15	1.15	0.15	0.15	0.15	0.15	0.15	0.15	1.15	-0.85
WT 2	0	-1	-1	-1	-1	0	0	0	0	1	2	-1	1	-1	1	0	2	0	-1	0
WT 3	0	1	1	1	-1	0	0	0	0	1	0	-1	0	0	-1	0	-1	0	0	0
WT 4	-0.8	0.2	0.2	-0.8	-0.8	0.2	-0.8	0.2	1.2	0.2	-0.8	-0.8	0.2	0.2	0.2	0.2	-0.8	2.2	-0.8	1.2
WT 5	-0.25	-0.25	0.75	0.75	1.75	-0.25	-1.25	-0.25	0.75	-0.25	-1.25	0.75	1.75	-1.25	1.75	-0.25	-1.25	-0.25	-0.25	-1.25
WT 6	-0.75	0.25	-0.75	-0.75	4.25	0.25	0.25	0.25	-0.75	-0.75	1.25	0.25	-1.75	-0.75	-0.75	-0.75	-1.75	1.25	1.25	0.25
WT 7	2.45	2.45	1.45	-0.55	0.45	-0.55	-1.55	1.45	0.45	-1.55	0.45	-0.55	-0.55	0.45	-0.55	0.45	-0.55	-0.55	-0.55	-2.55
WT 8	1	1	-1	-1	-1	0	1	-1	0	0	0	-1	1	0	-1	-1	0	2	1
WT 9	-0.55	-0.55	-0.55	0.45	-0.55	0.45	-0.55	0.45	1.45	0.45	-0.55	-1.55	0.45	-0.55	-0.55	0.45	0.45	1.45	0.45	-0.55
WT 10	-0.1	0.9	-1.1	-0.1	-0.1	0.9	-0.1	0.9	-1.1	-0.1	0.9	-0.1	-0.1	-0.1	-0.1	-1.1	-0.1	0.9	-0.1	-0.1
WT 11	-0.5	-0.5	0.5	-1.5	1.5	-1.5	1.5	1.5	-0.5	-0.5	0.5	-0.5	-1.5	-0.5	-0.5	-1.5	0.5	1.5	2.5	-0.5
WT 12	0.117647	-0.882353	0.117647	-0.882353	0.117647	0.117647	-0.882353	0.117647	0.117647	0.117647	0.117647	-0.882353	0.117647	1.11765	0.117647	1.11765	0.117647
Genotype	Normalized Stem Elongation Period (Fig S2, Fig S3D)
AT5G67340 decoy	0.35	-0.65	2.35	-0.65	-0.65	0.35	0.35	1.35	-1.65	-0.65	0.35	-0.65	0.35	-0.65	-0.65	0.35	0.35	1.35	1.35	0.35	0	0	1	3	0	0	1	0	0	0	1	0	0	1	0	0	0	4	3	0	-0.65	0.35	1.35	-0.65	-0.65	-1.65	0.35	0.35	0.35
AT1G67530 decoy	1	0	0	-1	0	0	1	-1	0	0	0	0	0	3	1	2	0	3	1	0	1	2	2	0	8	0	0	0	2	0	0	1	1	0	5	2	1	1	1	0	2	0	0	-4	0	0	-1	0	0
AT1G23030 decoy	-1.25	0.75	-0.25	3.75	-0.25	0.75	-1.25	0.75	-1.25	-1.25	-0.25	-0.25	0.75	0.75	-0.25	-1.25	0.75	-0.25	-0.25	-1.25	-1	1	0	0	4	-3	2	1	-2	1	-6	8	-4	-1	2	-1	3	0
AT3G46510 decoy	-0.25	-1.25	-1.25	-0.25	-1.25	-0.25	4.75	-0.25	-0.25	0.75	-0.25	12.75	1.75	5.75	2.75	-0.25	-11.25	-0.25	4.75	1.75	-5.25	-4.25	2.75	13.75
AT3G54850 decoy	-0.75	0.25	-0.75	-0.75	-0.75	0.25	-0.75	-0.75	-0.75	-0.75	-0.75	-0.75	-0.75	-0.75	1.25	2.25	1.25	-0.75	-0.75	0.25	-0.75	-0.75	-0.75	-0.75	-0.75	-0.75	-0.75	0.25	0.25	0.25	-1.75	-0.75	-0.75	-0.75	2.25	-0.75	-1.75	-0.75	-0.75	-0.75	-0.75	-0.75	0.25	-3.75	-0.75	-0.75	-1.75	0.25	-0.75
AT1G29340 decoy	-1.3	0.7	0.7	-0.3	-0.3	-0.3	-0.3	-0.3	-1.3	0.7	-0.3	2.7	0.7	-0.3	-1.3	-1.3	-0.3	-0.3	1.7	-1.3	-0.235294	-0.235294
AT1G10560 decoy	-0.25	-1.25	-0.25	-0.25	-0.25	-0.25	-0.25	-0.25	-0.25	-1.25	-0.25	0.75	0.75	-0.25	-1.25	-0.25	-1.25	0.75	0.75	28	3	3	-3	0	0	-1	-2	1	0	0	0	2	-3	7	-5	5	-1	-1	-4.23529	0.764706	1.76471	-2.23529	-0.235294	1.76471	-3.23529	-0.235294	0.764706	0.764706	-2.23529
AT1G66160 decoy	-0.25	-1.25	-0.25	-0.25	-1.25	-2.25	-0.25	-0.25	0.75	-0.25	-0.25	-2.25	0.75	-1.25	-0.25	-0.25	-1.25	-0.25	-0.25	-0.25	0.75	3.75	-0.25	-1.25	-0.25	-1.25	-0.25	-1.25	0.75	-1.25	-0.25	-0.25	-1.25	-1.25	0.75	0.75	-0.25	-1.25
AT5G37490 decoy	0	0	0	0	4	-1	-1	0	-1	0	-1	0	0	0	0	-1	0	4	3	-1	-0.25	-0.25	-0.25	-1.25	-0.25	-0.25	-0.25	-1.25	-1.25	-1.25	-0.25	-1.25	-0.25	0.75	-0.25	-0.25	-0.25	-0.25	0.75	-0.25
AT3G52450 decoy	-0.2	-0.2	0.8	0.8	-0.2	-0.2	0.8	0.8	0.8	0.8	-0.2	-0.2	-0.2	-0.2	0.8	0.8	-0.2	-0.2	0.8	0.8	3	1	0	-1	0	0	0	-1	0	-2	-1	2	0	0	0	1	0	-1	1
AT2G35930 decoy	-0.235294	-0.235294	-0.235294	0.764706	-0.235294	-0.235294	-1.23529	-1.23529	-1.23529	-0.235294	-0.235294	-0.235294	0.764706	0.764706
AT3G11840 decoy	-0.2	-0.2	-0.2	-0.2	-0.2	0.8	-0.2	-0.2	-0.2	0.8	1.8	-1.2	-0.2	1.8	-0.2	0.8	1.8	0.8	-0.2	1.8	0.8	-0.2	-1.2	-1.2	-0.2	-0.2	-0.2	0.8	-0.65	-0.65	-0.65	0.35	-1.65	0.35	-0.65	-0.65	0.35	0.35	-1.65	-0.65	-0.65	0.35	1.35	-0.65	-1.65	-0.65	0.35	-1.65
AT3G19380 decoy	-1.2	-1.2	-0.2	-1.2	0.8	0.8	1.8	0.8	0.8	0.8	-0.2	0.8	-0.2	0.8	-0.2	0.8	0.8	0.8	-0.2	-1	-1	2	0	0	1	5	-2	-1	3	-1	-1	3	-1	0	1	-1	1
AT1G49780 decoy	-0.75	-1.75	-0.75	-0.75	-0.75	-1.75	-0.75	-1.75	-1.75	-1.75	-0.75	-0.75	-0.75	-0.75	-1.75	-0.75	1.25	-0.75	-0.75	-0.75	-0.75	-0.75	0.25	-0.75	1.25	-0.75	-0.75	-1.75	-1.75	-0.75	-0.75	-0.75	0.25	-0.75	0.25	-0.75	1.25	-0.75	-0.75	-1.75
AT5G64660 decoy	-2.25	-1.25	-1.25	-0.25	-0.25	-0.25	-1.25	-1.25	-0.25	-0.25	-0.25	-1.25	-1.25	-0.25	-0.25	-0.25	-0.25	-0.25	-0.25	0.75	-0.2	0.8	-0.2	1.8	1.8	-1.2	-1.2	0.8	0.8	-1.2	-0.2	-0.2	-0.2	-1.2	-1.2	0.8	-0.2	-0.2	-0.2	-0.2
AT5G09800 decoy	-1.3	1.7	-0.3	1.7	1.7	2.7	0.7
AT3G18710 decoy	-0.3	-0.3	-1.3	-0.3	0.7	0.7	-1.3	-0.3	-0.3	-1.3	0.7	-0.3	-1.3	-1.3	-1.3	-0.3	-1.3	-0.3	0.7	-0.3
AT3G49810 decoy	-0.3	-0.3	0.7	0.7	0.7	0.7	-0.3	0.7	0.7	1.7	-0.3	-0.3	-1.3	0.7	-0.3	1.7	0.7	1.7	-0.3	0.7	-0.65	-0.65	-0.65	-0.65	0.35	0.35	-0.65	0.35	-0.65	0.35	0.35	1.35	-0.65	0.35	0.35	-2.65	-3.65	0.35	-0.65
AT5G65920 decoy	0.8	-0.2	-0.2	-0.2	-0.2	-1.2	0.8	0.8	1.8	-0.2	0.8	-0.2	-1.2	0.8	-0.2	-1.2	0.8	-0.2	-0.2	1.8	-0.2	-0.2	0.8	-1.2	3.8	0.8	-0.2	-0.2	-1.2	0.8	-1.2	-1.2	0.8	-0.2	1.8	-0.2	-1.2	-1.2
AT3G49060 decoy	-0.8	-0.8	0.2	1.2	-0.8	-0.8	-0.8	1.2	0.2	-0.8	-0.8	0.2	0.2	-0.8	-0.8	-0.8	0.2	-0.8	0.2	0.2
AT2G45910 decoy	-1.2	-0.2	-1.2	-0.2	-0.2	-0.2	-0.2	0.8	-0.2	-0.2	-1.2	0.8	-0.2	-0.2	-1.2	-0.2	-0.2	-0.2	-0.2	-0.2
AT3G61390 decoy	-0.3	-1.3	-0.3	-0.3	-1.3	-0.3	0.7	-0.3	-0.3	-1.3	-0.3	-1.3	-1.3	-1.3	-0.3	-0.3	-1.3	-1.3	-0.3	-1.3
AT2G45920 decoy	-0.8	0.2	0.2	0.2	-0.8	-0.8	0.2	0.2	-0.8	0.2	-0.8	-1.8	-0.8	-0.8	-1.8	-0.8	0.2	2.2	0.2	-0.8
AT5G65200 decoy	1.76471	-0.235294	-0.235294	4.76471	-0.235294	2.76471	-1.23529	-1.23529	5.76471	-3.23529
AT3G47820 decoy	0.2	-0.8	0.2	0.2	0.2	2.2	-0.8	0.2	-1.8	-8.8	0.2	0.2	8.2	-2.8	2.2	-1.8	4.2	-0.8	11.2	-1.8	-0.235294
AT5G40140 decoy	-0.3	-1.3	-1.3	-1.3	-0.3	-1.3	-1.3	-0.3	-0.3	-0.3	-0.3	-1.3	-0.3	-0.3	-1.3	1.7	0.7	-1.3	-0.3	-0.3	1.35	0.35	0.35	0.35	2.35	-0.65	0.35	-0.65	0.35	-0.65	0.35	0.35	-0.65	-0.65	1.35	-0.65	0.35	1.35	0.35
AT5G62560 decoy	0.2	-0.8	-0.8	0.2	0.2	1.2	1.2	0.2	0.2	-0.8	0.2	-3.8	0.2	1.2	1.2	-0.8	0.2	-0.8	-0.8	1.2
AT1G20780 decoy	-0.235294	-0.235294	0.764706	0.764706	-0.235294	-0.235294	-0.235294	1.76471
AT1G27910 decoy	0	-1	1	1	0	0	1	2	2	1	1.35	-0.65	2.35	2.35	0.35	-0.65	0.35	1.35	0.35	-0.65	0.35	1.35	1.35	0.35	0.35	0.35	0.35	-0.65	4.35	2.35
AT5G18320 decoy	-0.3	-0.3	-0.3	-0.3	0.7	-0.3	-0.3	0.7	-0.3	-1.3	-0.3	-0.3	-1.3	1.35	-0.65	5.35	2.35	-0.65	-0.65	0.35	-0.65	-0.65	-0.65	0.35	-0.65	0.35	1.35	-0.65	1.35	1.35	-0.65	1.35	-0.65
AT5G18330 decoy	-0.3	-0.3	0.7	-0.3	-1.3	-1.3	-1.3	-0.3	-0.3	-0.3	-0.3	-0.3	-1.3	-1.3	-1.3	-1.3	0.7	-0.3	0.7	-0.3	0.2	0.2	0.2	-0.8	1.2	-0.8	0.2
AT5G18340 decoy	-1.3	1.7	-0.3	-1.3	-0.3	-1.3	-1.3	-0.3	0.7	1.7	-1.3	-1.3	-0.3	-0.3	-1.3	-1.3	-0.3	-0.3	-0.3	-0.3	-0.85	-1.85	-0.85	3.15	0.15	-0.85	-0.85	-1.85	1.15	-2.85	-1.85	0.15	-0.85	2.15	-1.85	1.15	-1.85	0.15	-0.85	-0.85	-0.235294	0.764706	-0.235294	-0.235294	-0.235294	-0.235294	-0.235294	-1.23529	0.764706
AT5G67530 decoy	1	0	0	0	0	0	0	0	0	-1	-1	1	0	-1	-1	1	-1	-2	0	3	-0.8	0.2	0.2	2.2	1.2	0.2	0.2	0.2	-0.8	-0.8	0.2	1.2	2.2	2.2	0.2	-0.8	-0.8	2.2	0.2	0.2
AT5G65500 decoy	-0.8	0.2	0.2	0.2	0.2	0.2	-0.8	0.2	-0.8	-0.8	0.2	-0.8	0.2	-16.8	-0.8	3.2	-1.8	0.2	2.2	-4.8
AT5G61560 decoy	0.35	0.35	0.35	0.35	1.35	-0.65	0.35	0.35	0.35	2.35	0	0	0	0	0	0
AT1G01680 decoy	-1.85	-0.85	0.15	-1.85	-0.85	0.15	-0.85	0.15	-0.85	-1.85	-1.85	-1.85	1.15	0.15	0.15	-0.85	0.15	1.15	-1.85	-0.85	2	2	-2	1	-4	1	-4	0	-5
AT1G01670 decoy	0.35	-0.65	1.35	0.35	-0.65	0.35	-0.65	0.35	0.35	2.35	0.15	0.15	0.15	0.15	0.15	0.15	0.15	1.15	3.15	4.15	0.15	0.15	1.15	0.15	-0.85	-0.85	-0.85	0.15	-0.85	-0.85	1	1	1	0	0	0	1	1	0	0	0	-2	6	-1	1	-1
AT1G04510 decoy	0.764706	1.76471	0.764706	-0.235294	-0.235294	0.764706	-0.235294	-0.235294	-0.235294	0.764706	0.764706	0.764706	1.76471	0.764706	0.764706	0.764706	-0.235294	-0.235294	-0.235294	0.764706	-0.235294	-0.235294	-0.235294	-1.23529	-0.235294	0.764706	3.76471	0.764706
AT2G33340 decoy	0.45	0.45	0.45	4.45	3.45	0.45	0.45	1.45	-0.55	0.45	-1.55	0.45	0.45	0.45	0.45	0.45	0.45	-0.55	0.45	0.45	1.45	0.45	0.45	0.45	-0.55	0.45	1.45	0.45	1.45	2.45	-0.55	1.45	1.45	0.45	0.45	1.45	0.45	0.45	0.45	-0.55
AT3G07370 decoy	0.764706	0.764706	-0.235294	0.764706	-0.235294	-1.23529	-0.235294	-0.235294	-0.235294	-0.235294	-1.23529	-0.235294	-0.235294	0.764706	-1.23529	-0.235294
WT 1	1.45	-0.55	-0.55	-0.55	-0.55	-0.55	-0.55	2.45	-1.55	-0.55	0.45	1.45	-0.55	0.45	0.45	-0.55	-0.55	-0.55	0.45	0.45
WT 2	0.7	0.7	-1.3	-0.3	-0.3	-0.3	-0.3	0.7	-0.3	0.7	1.7	-1.3	-0.3	0.7	0.7	-0.3	0.7	-0.3	-1.3	-0.3
WT 3	-0.2	0.8	0.8	0.8	-0.2	-0.2	-0.2	-0.2	-0.2	0.8	0.8	-0.2	-0.2	-0.2	-1.2	-0.2	-0.2	-0.2	-0.2	-0.2
WT 4	0	0	-1	-1	0	1	-1	-1	-1	1	1	0	0	1	0	0	0	1	0	0
WT 5	-0.25	-0.25	0.75	0.75	0.75	-0.25	-1.25	-0.25	0.75	-0.25	-0.25	-0.25	0.75	-0.25	0.75	-1.25	-0.25	0.75	-0.25	-0.25
WT 6	-0.65	1.35	-1.65	-1.65	2.35	0.35	0.35	1.35	0.35	-0.65	0.35	1.35	0.35	-0.65	-0.65	0.35	-0.65	-0.65	-0.65	-0.65
WT 7	0.15	1.15	0.15	-0.85	-0.85	0.15	-0.85	1.15	-0.85	-1.85	0.15	0.15	1.15	2.15	0.15	3.15	-1.85	0.15	-1.85	-0.85
WT 8	-1	-1	0	-1	0	0	-1	-1	0	1	1	0	1	1	0	1	-1	-1	2
WT 9	-0.8	-0.8	-0.8	2.2	0.2	0.2	0.2	0.2	1.2	1.2	-0.8	-0.8	0.2	-0.8	-0.8	0.2	0.2	0.2	0.2	-0.8
WT 10	0.25	0.25	-0.75	-0.75	0.25	-0.75	-0.75	1.25	-0.75	0.25	0.25	1.25	0.25	-0.75	-0.75	-0.75	0.25	1.25	0.25	0.25
WT 11	-0.65	-0.65	-0.65	-0.65	0.35	-1.65	1.35	1.35	-0.65	-0.65	-0.65	0.35	1.35	0.35	0.35	-2.65	-0.65	2.35	1.35	0.35
WT 12	0.764706	-0.235294	-0.235294	-0.235294	0.764706	-0.235294	-0.235294	-0.235294	-0.235294	0.764706	0.764706	-1.23529	0.764706	-0.235294	-0.235294	0.764706	-1.23529
[truncated: 11 more columns]
